# Supplementary material for: Resveratrol Prevents Cytoarchitectural and Interneuronal Alterations in the Valproic Acid Rat Model of Autism
Source: MDPI journal article supplement (doi:10.3390/ijms23084075), 2022-04-07
Supplement: s1 [file s1]

**Supplementary Table S1. Total Neurons distribution profile in HC**

| Mean ± SD                                         |                                                                                             | F (DFn. DFd); p Value                                                                                                | Pairwise comparisons |          |
|---------------------------------------------------|---------------------------------------------------------------------------------------------|----------------------------------------------------------------------------------------------------------------------|----------------------|----------|
| <b>Total Neu-<br/>rons/Area</b><br><br><b>CA1</b> | CON: 0.0051±0.00087<br>RSV:0.0042±0.00052<br>VPA: 0.0041±0.00048<br>RSV+VPA:0.0045±0.00047  | Interaction:F (1, 12) = 4.036 p =0.0676#<br>VPA: F (1, 12) = 1.210 p =0.2929<br>RSV: F (1, 12) = 0.6974 p =0.4200    | CON vs RSV:          | 0.4040   |
|                                                   |                                                                                             |                                                                                                                      | CON vs VPA:          | 0.2896   |
|                                                   |                                                                                             |                                                                                                                      | CON vs RSV+VPA:      | > 0.9999 |
|                                                   |                                                                                             |                                                                                                                      | RSV vs VPA:          | > 0.9999 |
|                                                   |                                                                                             |                                                                                                                      | RSV vs RSV+VPA:      | > 0.9999 |
|                                                   |                                                                                             |                                                                                                                      | VPA vs RSV+VPA:      | > 0.9999 |
|                                                   |                                                                                             |                                                                                                                      |                      |          |
| <b>Total Neu-<br/>rons/Area</b><br><br><b>CA2</b> | CON: 0.0030±0.00013<br>RSV:0.0027±0.000037<br>VPA: 0.0026±0.00027<br>RSV+VPA:0.0031±0.00031 | Interaction:F (1, 12) = 12.45 p =0.0042**<br>VPA: F (1, 12) = 0.007008 p =0.9347<br>RSV: F (1, 12) = 1.116 p =0.3117 | CON vs RSV:          | 0.6355   |
|                                                   |                                                                                             |                                                                                                                      | CON vs VPA:          | 0.1516   |
|                                                   |                                                                                             |                                                                                                                      | CON vs RSV+VPA:      | > 0.9999 |
|                                                   |                                                                                             |                                                                                                                      | RSV vs VPA:          | > 0.9999 |
|                                                   |                                                                                             |                                                                                                                      | RSV vs RSV+VPA:      | 0.1883   |
|                                                   |                                                                                             |                                                                                                                      | VPA vs RSV+VPA:      | 0.0424*  |
|                                                   |                                                                                             |                                                                                                                      |                      |          |
| <b>Total Neu-<br/>rons/Area</b><br><br><b>CA3</b> | CON: 0.0029±0.00058<br>RSV: 0.0027±0.00029<br>VPA: 0.0028±0.00087<br>RSV+VPA:0.0032±0.0034  | Interaction:F (1, 12) = 1.494 p =0.2450<br>VPA: F (1, 12) = 0.9729 p =0.3434<br>RSV: F (1, 12) = 0.6828 p =0.4247    | CON vs RSV:          | > 0.9999 |
|                                                   |                                                                                             |                                                                                                                      | CON vs VPA:          | > 0.9999 |
|                                                   |                                                                                             |                                                                                                                      | CON vs RSV+VPA:      | > 0.9999 |
|                                                   |                                                                                             |                                                                                                                      | RSV vs VPA:          | > 0.9999 |
|                                                   |                                                                                             |                                                                                                                      | RSV vs RSV+VPA:      | 0.8657   |
|                                                   |                                                                                             |                                                                                                                      | VPA vs RSV+VPA:      | > 0.9999 |
|                                                   |                                                                                             |                                                                                                                      |                      |          |

**HC:** hippocampus; **SD:** standard deviation. p <0.05 was considered significant. \*p<0.05. \*\*p<0.01, #trend. Statistical analyses: two-way ANOVA parametric test followed by Bonferroni. N<sub>CON</sub>: 4. N<sub>RSV</sub>: 4. N<sub>VPA</sub>: 4. N<sub>RSV+VPA</sub>: 4.

**Supplementary Table S2. Distribution profile of PV neurons in the HC**

| Mean ± SD       |                                                                                                    | F (DFn, DFd); p Value                                                                                              | Pairwise comparisons |          |
|-----------------|----------------------------------------------------------------------------------------------------|--------------------------------------------------------------------------------------------------------------------|----------------------|----------|
| <b>PV /Area</b> | CON: 0.00022±0.000023<br>RSV:0.00021±0.000030<br>VPA:0.00023±0.000040<br>RSV+VPA:0.00020±0.000030  | Interaction: F (1, 12) = 0.322 p =0.580<br>VPA: F (1, 12) = 0.03768 p =0.8493<br>RSV: F (1, 12) = 1.685 p =0.2186  | CON vs RSV:          | > 0.9999 |
|                 |                                                                                                    |                                                                                                                    | CON vs VPA:          | > 0.9999 |
|                 |                                                                                                    |                                                                                                                    | CON vs RSV+VPA:      | > 0.9999 |
|                 |                                                                                                    |                                                                                                                    | RSV vs VPA:          | > 0.9999 |
|                 |                                                                                                    |                                                                                                                    | RSV vs RSV+VPA:      | > 0.9999 |
| <b>CA1</b>      |                                                                                                    |                                                                                                                    | VPA vs RSV+VPA:      | > 0.9999 |
|                 |                                                                                                    |                                                                                                                    | CON vs RSV:          | > 0.9999 |
|                 |                                                                                                    |                                                                                                                    | CON vs VPA:          | > 0.9999 |
|                 |                                                                                                    |                                                                                                                    | CON vs RSV+VPA:      | > 0.9999 |
|                 |                                                                                                    |                                                                                                                    | RSV vs VPA:          | 0.6772   |
| <b>PV Ratio</b> | CON: 0.054±0.009<br>RSV:0.047±0.008<br>VPA: 0.057±0.005<br>RSV+VPA:0.050±0.011                     | Interaction:F (1, 12) = 0.0014 p =0.970<br>VPA: F (1, 12) = 0.4375 p =0.5208<br>RSV: F (1, 12) = 3.089 p =0.1043   | RSV vs RSV+VPA:      | > 0.9999 |
|                 |                                                                                                    |                                                                                                                    | VPA vs RSV+VPA:      | > 0.9999 |
|                 |                                                                                                    |                                                                                                                    | CON vs RSV:          | > 0.9999 |
|                 |                                                                                                    |                                                                                                                    | CON vs VPA:          | > 0.9999 |
|                 |                                                                                                    |                                                                                                                    | CON vs RSV+VPA:      | 0.4516   |
| <b>CA2</b>      | CON: 0.00016±0.000036<br>RSV:0.00014±0.000035<br>VPA: 0.00016±0.000021<br>RSV+VPA:0.00012±0.000024 | Interaction: F (1, 12) = 1.367 p =0.265<br>VPA: F (1, 12) = 0.7516 p =0.4030<br>RSV: F (1, 12) = 3.561 p =0.0836#  | RSV vs VPA:          | > 0.9999 |
|                 |                                                                                                    |                                                                                                                    | RSV vs RSV+VPA:      | > 0.9999 |
|                 |                                                                                                    |                                                                                                                    | VPA vs RSV+VPA:      | 0.3096   |
|                 |                                                                                                    |                                                                                                                    | CON vs RSV:          | 0.05256  |
|                 |                                                                                                    |                                                                                                                    | CON vs VPA:          | > 0.9999 |
| <b>PV /Area</b> | CON: 0.044±0.008<br>RSV:0.057±0.005<br>VPA: 0.050±0.013<br>RSV+VPA: 0.043±0.011                    | Interaction:F (1, 12) = 4.109 p =0.0655#<br>VPA: F (1, 12) = 0.6387 p =0.4397<br>RSV: F (1, 12) = 0.3637 p =0.5577 | CON vs RSV+VPA:      | > 0.9999 |
|                 |                                                                                                    |                                                                                                                    | RSV vs VPA:          | > 0.9999 |
|                 |                                                                                                    |                                                                                                                    | RSV vs RSV+VPA:      | 0.4130   |
|                 |                                                                                                    |                                                                                                                    | VPA vs RSV+VPA:      | > 0.9999 |
|                 |                                                                                                    |                                                                                                                    | CON vs RSV:          | 0.3139   |
| <b>CA3</b>      | CON:0.00023±0.000043<br>RSV:0.00018±0.000017<br>VPA:0.00023± 0.000040<br>RSV+VPA: 0.00016±0.000019 | Interaction: F (1, 12) = 0.975 p =0.342<br>VPA: F (1, 12) = 0.6635 p =0.4312<br>RSV: F (1, 12) = 16.27 p =0.0017** | CON vs VPA:          | > 0.9999 |
|                 |                                                                                                    |                                                                                                                    | CON vs RSV+VPA:      | 0.0300*  |
|                 |                                                                                                    |                                                                                                                    | RSV vs VPA:          | 0.2519   |
|                 |                                                                                                    |                                                                                                                    | RSV vs RSV+VPA:      | > 0.9999 |
|                 |                                                                                                    |                                                                                                                    | VPA vs RSV+VPA:      | 0.0240*  |
| <b>PV Ratio</b> | CON:0.072±0.013<br>RSV:0.063±0.004<br>VPA:0.059±0.013<br>RSV+VPA: 0.052±0.011                      | Interaction:F (1, 12) = 0.0289 p =0.867<br>VPA: F (1, 12) = 4.742 p =0.0501#<br>RSV: F (1, 12) = 2.184 p =0.1652   | CON vs RSV:          | > 0.9999 |
|                 |                                                                                                    |                                                                                                                    | CON vs VPA:          | 0.7366   |
|                 |                                                                                                    |                                                                                                                    | CON vs RSV+VPA:      | 0.1433   |
|                 |                                                                                                    |                                                                                                                    | RSV vs VPA:          | > 0.9999 |
|                 |                                                                                                    |                                                                                                                    | RSV vs RSV+VPA:      | > 0.9999 |
| <b>CA3</b>      |                                                                                                    |                                                                                                                    | VPA vs RSV+VPA:      | > 0.9999 |
|                 |                                                                                                    |                                                                                                                    |                      |          |

**PV:** parvalbumin-positive interneuron; **HC:** hippocampus; **SD:** standard deviation. p <0.05 was considered significant. \*p<0.05. \*\*p<0.01, #trend. Statistical analyses: two-way ANOVA parametric test followed by Bonferroni. N<sub>CON</sub>: 4. N<sub>RSV</sub>: 4. N<sub>VPA</sub>: 4. N<sub>RSV+VPA</sub>: 4.

**Supplementary Table S3. Distribution profile of CB neurons in the HC**

| Mean ± SD |                         | F (DFn, DFd); p Value                                                                                              | Pairwise comparisons       |                 |          |
|-----------|-------------------------|--------------------------------------------------------------------------------------------------------------------|----------------------------|-----------------|----------|
| CB /Area  | CON: 0.000072±0.000014  | Interaction:F (1, 11) = 1.151 p =0.3062<br>VPA: F (1, 11) = 14.32 p =0.0030**<br>RSV: F (1, 11) = 1.421 p =0.2583  | CON vs RSV:                | 0.7420          |          |
|           | RSV: 0.000097±0.000019  |                                                                                                                    | CON vs VPA:                | 0.4284          |          |
|           | VPA: 0.000044±0.000028  |                                                                                                                    | CON vs RSV+VPA:            | 0.6306          |          |
|           | CA1                     |                                                                                                                    | RSV+VPA: 0.000045±0.000015 | RSV vs VPA:     | 0.0224*  |
|           |                         |                                                                                                                    |                            | RSV vs RSV+VPA: | 0.0418*  |
|           |                         |                                                                                                                    | VPA vs RSV+VPA:            | > 0.9999        |          |
| CB Ratio  | CON: 0.017±0.003        | Interaction:F (1, 12) = 0.782 p =0.3938<br>VPA: F (1, 12) = 1.679 p =0.2194<br>RSV: F (1, 12) = 1.258 p =0.2839    | CON vs RSV:                | 0.9263          |          |
|           | RSV: 0.024±0.003        |                                                                                                                    | CON vs VPA:                | > 0.9999        |          |
|           | VPA: 0.015±0.010        |                                                                                                                    | CON vs RSV+VPA:            | > 0.9999        |          |
|           | CA1                     |                                                                                                                    | RSV+VPA: 0.016±0.008       | RSV vs VPA:     | 0.6471   |
|           |                         |                                                                                                                    |                            | RSV vs RSV+VPA: | > 0.9999 |
|           |                         |                                                                                                                    | VPA vs RSV+VPA:            | > 0.9999        |          |
| CB /Area  | CON: 0.000035±0.0000053 | Interaction:F (1, 11) = 0.0014 p =0.971<br>VPA: F (1, 11) = 9.038 p =0.0119*<br>RSV: F (1, 11) = 3.388 p =0.0928#  | CON vs RSV:                | > 0.9999        |          |
|           | RSV:0.000050±0.000022   |                                                                                                                    | CON vs VPA:                | 0.2801          |          |
|           | VPA:0.000010±0.0000021  |                                                                                                                    | CON vs RSV+VPA:            | > 0.9999        |          |
|           | CA2                     |                                                                                                                    | RSV+VPA:0.000026±0.000022  | RSV vs VPA:     | 0.0265*  |
|           |                         |                                                                                                                    |                            | RSV vs RSV+VPA: | 0.4084   |
|           |                         |                                                                                                                    | VPA vs RSV+VPA:            | > 0.9999        |          |
| CB Ratio  | CON: 0.015±0.004        | Interaction:F (1, 11) = 0.00547 p =0.942<br>VPA: F (1, 11) = 10.50 p =0.0079**<br>RSV: F (1, 11) = 1.671 p =0.2226 | CON vs RSV:                | > 0.9999        |          |
|           | RSV:0.018±0.006         |                                                                                                                    | CON vs VPA:                | 0.1972          |          |
|           | VPA: 0.006±0.003        |                                                                                                                    | CON vs RSV+VPA:            | > 0.9999        |          |
|           | CA2                     |                                                                                                                    | RSV+VPA: 0.009±0.006       | RSV vs VPA:     | 0.0398*  |
|           |                         |                                                                                                                    |                            | RSV vs RSV+VPA: | 0.3233   |
|           |                         |                                                                                                                    | VPA vs RSV+VPA:            | > 0.9999        |          |
| CB /Area  | CON:0.000069±0.000021   | Interaction:F (1, 10) = 0.625 p =0.4475<br>VPA: F (1, 10) = 11.52 p =0.0068**<br>RSV: F (1, 10) = 0.7661 p =0.4020 | CON vs RSV:                | > 0.9999        |          |
|           | RSV: 0.000068±0.000014  |                                                                                                                    | CON vs VPA:                | 0.5725          |          |
|           | VPA: 0.000044±0.000019  |                                                                                                                    | CON vs RSV+VPA:            | 0.1082          |          |
|           | CA3                     |                                                                                                                    | RSV+VPA: 0.000030±0.000013 | RSV vs VPA:     | 0.4995   |
|           |                         |                                                                                                                    |                            | RSV vs RSV+VPA: | 0.0858#  |
|           |                         |                                                                                                                    | VPA vs RSV+VPA:            | > 0.9999        |          |
| CB Ratio  | CON: 0.022±0.005        | Interaction: F (1, 10) = 0.679 p =0.429<br>VPA: F (1, 10) = 19.20 p =0.0014**<br>RSV: F (1, 10) = 0.8092 p =0.3895 | CON vs RSV:                | > 0.9999        |          |
|           | RSV: 0.022±0.006        |                                                                                                                    | CON vs VPA:                | 0.1836          |          |
|           | VPA: 0.013±0.004        |                                                                                                                    | CON vs RSV+VPA:            | 0.0347*         |          |
|           | CA3                     |                                                                                                                    | RSV+VPA: 0.09±0.003        | RSV vs VPA:     | 0.1434   |
|           |                         |                                                                                                                    |                            | RSV vs RSV+VPA: | 0.0254*  |
|           |                         |                                                                                                                    | VPA vs RSV+VPA:            | > 0.9999        |          |

**CB:** calbindin-positive interneuron; **HC:** hippocampus; **SD:** standard deviation. p <0.05 was considered significant. \*p<0.05. \*\*p<0.01, #trend. Statistical analyses: two-way ANOVA parametric test followed by Bonferroni. N<sub>CON</sub>: 4. N<sub>RSV</sub>: 4. N<sub>VPA</sub>: 4. N<sub>RSV+VPA</sub>: 3.

**Supplementary Table S4. Distribution profile of SOM neurons in the HC**

| Mean ± SD      |                                                                                                      | F (DFn. DFd); p Value                                                                                              | Pairwise comparisons |          |
|----------------|------------------------------------------------------------------------------------------------------|--------------------------------------------------------------------------------------------------------------------|----------------------|----------|
| SOM /Area      | CON: 0.00017±0.000031<br>RSV:0.00015±0.000026<br>VPA: 0.000168±0.000057<br>RSV+VPA: 0.00021±0.000048 | Interaction:F (1, 12) = 2.670 p =0.1282<br>VPA: F (1, 12) = 2.302 p =0.1551<br>RSV: F (1, 12) = 0.8441 p =0.3763   | CON vs RSV:          | > 0.9999 |
|                |                                                                                                      |                                                                                                                    | CON vs VPA:          | > 0.9999 |
|                |                                                                                                      |                                                                                                                    | CON vs RSV+VPA:      | 0.6637   |
|                |                                                                                                      |                                                                                                                    | RSV vs VPA:          | > 0.9999 |
|                |                                                                                                      |                                                                                                                    | RSV vs RSV+VPA:      | 0.2745   |
| CA1            |                                                                                                      |                                                                                                                    | VPA vs RSV+VPA:      | 0.5772   |
| SOM Ra-<br>tio | CON: 0.034±0.0098<br>RSV: 0.039±0.0047<br>VPA: 0.044±0.0016<br>RSV+VPA: 0.045±0.0052                 | Interaction:F (1, 12) = 0.0685 p =0.797<br>VPA:F (1, 12) = 2.754 p =0.1229<br>RSV: F (1, 12) = 0.4506 p =0.5148    | CON vs RSV:          | > 0.9999 |
|                |                                                                                                      |                                                                                                                    | CON vs VPA:          | > 0.9999 |
|                |                                                                                                      |                                                                                                                    | CON vs RSV+VPA:      | 0.7516   |
|                |                                                                                                      |                                                                                                                    | RSV vs VPA:          | > 0.9999 |
|                |                                                                                                      |                                                                                                                    | RSV vs RSV+VPA:      | > 0.9999 |
| CA1            |                                                                                                      |                                                                                                                    | VPA vs RSV+VPA:      | > 0.9999 |
| SOM/Are<br>a   | CON: 0.00011±0.000017<br>RSV: 0.00010±0.000018<br>VPA: 0.000084±0.000013<br>RSV+VPA:0.000088±0.00001 | Interaction:F (1, 12) = 1.030 p =0.3301<br>VPA: F (1, 12) = 8.942 p =0.0113*<br>RSV: F (1, 12) = 0.2051 p =0.6587  | CON vs RSV:          | > 0.9999 |
|                |                                                                                                      |                                                                                                                    | CON vs VPA:          | 0.0907#  |
|                |                                                                                                      |                                                                                                                    | CON vs RSV+VPA:      | 0.1888   |
|                |                                                                                                      |                                                                                                                    | RSV vs VPA:          | 0.5879   |
|                |                                                                                                      |                                                                                                                    | RSV vs RSV+VPA:      | > 0.9999 |
| CA2            |                                                                                                      |                                                                                                                    | VPA vs RSV+VPA:      | > 0.9999 |
| SOM Ra-<br>tio | CON: 0.038±0.0054<br>RSV: 0.043±0.0059<br>VPA: 0.032±0.0066<br>RSV+VPA:0.031±0.0031                  | Interaction:F (1, 12) = 1.866 p =0.1970<br>VPA: F (1, 12) = 11.62 p =0.0052**<br>RSV: F (1, 12) = 0.4153 p =0.531  | CON vs RSV:          | > 0.9999 |
|                |                                                                                                      |                                                                                                                    | CON vs VPA:          | > 0.9999 |
|                |                                                                                                      |                                                                                                                    | CON vs RSV+VPA:      | 0.4460   |
|                |                                                                                                      |                                                                                                                    | RSV vs VPA:          | 0.0852#  |
|                |                                                                                                      |                                                                                                                    | RSV vs RSV+VPA:      | 0.0330*  |
| CA2            |                                                                                                      |                                                                                                                    | VPA vs RSV+VPA:      | > 0.9999 |
| SOM /Area      | CON: 0.00010±0.000020<br>RSV: 0.00014±0.000016<br>VPA: 0.00010±0.000035<br>RSV+VPA: 0.00014±0.000029 | Interaction:F (1, 12) = 0.0885 p =0.771<br>VPA: F (1, 12) = 0.04458 p =0.8363<br>RSV: F (1, 12) = 8.007 p =0.0152* | CON vs RSV:          | 0.5916   |
|                |                                                                                                      |                                                                                                                    | CON vs VPA:          | > 0.9999 |
|                |                                                                                                      |                                                                                                                    | CON vs RSV+VPA:      | 0.3157   |
|                |                                                                                                      |                                                                                                                    | RSV vs VPA:          | 0.5330   |
|                |                                                                                                      |                                                                                                                    | RSV vs RSV+VPA:      | > 0.9999 |
| CA3            |                                                                                                      |                                                                                                                    | VPA vs RSV+VPA:      | 0.2830   |
| SOM Ra-<br>tio | CON: 0.037±0.012<br>RSV: 0.050±0.006<br>VPA: 0.038±0.008<br>RSV+VPA: 0.044±0.013                     | Interaction:F (1, 12) = 0.498 p =0.4935<br>VPA: F (1, 12) = 0.3335 p =0.5743<br>RSV: F (1, 12) = 3.713 p =0.0780#  | CON vs RSV:          | 0.5237   |
|                |                                                                                                      |                                                                                                                    | CON vs VPA:          | > 0.9999 |
|                |                                                                                                      |                                                                                                                    | CON vs RSV+VPA:      | > 0.9999 |
|                |                                                                                                      |                                                                                                                    | RSV vs VPA:          | 0.6118   |
|                |                                                                                                      |                                                                                                                    | RSV vs RSV+VPA:      | > 0.9999 |
| CA3            |                                                                                                      |                                                                                                                    | VPA vs RSV+VPA:      | > 0.9999 |

**SOM:** somatostatin-positive interneuron; **HC:** hippocampus; **SD:** standard deviation. p <0.05 was considered significant. \*p<0.05. \*\*p<0.01, #trend. Statistical analyses: two-way ANOVA parametric test followed by Bonferroni. N<sub>CON</sub>: 4. N<sub>RSV</sub>: 4. N<sub>VPA</sub>: 4. N<sub>RSV+VPA</sub>: 4.

**Supplementary Table S5 – Information on key immunofluorescence and western blotting reagents**

| Immunofluorescence                         |                  |            |                                                       |
|--------------------------------------------|------------------|------------|-------------------------------------------------------|
| Reagent                                    | Supplier         | Code       | Dilution and Time                                     |
| Anti-NeuN (Mouse)                          | Merck            | MAB3771    | 1:500 in PBS-Triton 0.1% overnight at 4°C             |
| Anti-NeuN                                  | Abcam            | Ab177487   | 1:500 in PBS-Triton 0.1% overnight at 4°C             |
| Anti-Parvalbumin                           | Abcam            | Ab64555    | 1:500 in PBS-Triton 0.1% overnight at 4°C             |
| Anti-Calbindin                             | Abcam            | Ab82812    | 1:500 in PBS-Triton 0.1% overnight at 4°C             |
| Anti-Somatostatin                          | Sigma-Aldrich    | SAB4502861 | 1:500 in PBS-Triton 0.1% overnight at 4°C             |
| Alexa Fluor 488 Goat Anti-Mouse IgG (H+L)  | Molecular Probes | Ab11029    | 1:2000 in PBS-Triton 0.1% in room temperature for 1h  |
| Alexa Fluor 594 Goat Anti-Rabbit IgG (H+L) | Molecular Probes | Ab150080   | 1:2000* in PBS-Triton 0.1% in room temperature for 1h |
| DAPI Nucleic Acid Stain                    | Invitrogen       | MP01306    | 30 uL per slice                                       |
| Mounting Medium Fluorshield                | Sigma-Aldrich    | F6182-20ML | 30 uL per slice                                       |

\* In SOM<sup>+</sup> assay, the concentration was 1:1000

| Western blotting           |                          |          |                            |
|----------------------------|--------------------------|----------|----------------------------|
| Reagent                    | Supplier                 | Code     | Dilution                   |
| GABA <sub>A</sub> (goat)   | Santa Cruz Biotechnology | sc-31405 | 1:250 in 5% BSA-0.1%TTBS   |
| GABA <sub>B</sub> (rabbit) | Santa Cruz Biotechnology | sc-14006 | 1:500 in 5% BSA-0.1%TTBS   |
| Gephyrin (rabbit)          | Abcam                    | ab32206  | 1:500 in 5% BSA-0.1%TTBS   |
| Neurologin-2 (rabbit)      | Abcam                    | ab36602  | 1:500 in 5% milk -0.1%TTBS |
| PSD-95 (rabbit)            | Abcam                    | ab18258  | 1:500 in 5% BSA-0.1%TTBS   |
| Synaptophysin (mouse)      | SIGMA Aldrich            | S5768    | 1:1000 in 5% BSA-0.1%TTBS  |
| Anti-β-actin (mouse)       | SIGMA Aldrich            | A1978    | 1:3000 in TTBS             |
| IgG-HRP (goat)             | Santa Cruz Biotechnology | sc-2354  | 1:1000 in 5% BSA-0.1%TTBS  |
| IgG-HRP (mouse)            | Santa Cruz Biotechnology | sc-2314  | 1:1000 in 5% milk-0.1%TTBS |
| IgG-HRP (rabbit)           | Santa Cruz Biotechnology | sc-2004  | 1:1000 in 0.1%TTBS         |

| Common reagents             |                                                     |
|-----------------------------|-----------------------------------------------------|
| PBS                         | 0.1 M pH 7.4 Phosphate-buffered saline              |
| SDS 10%                     | Sodium dodecyl sulfate                              |
| EDTA 100 mM                 | Ethylenediamine tetraacetic acid                    |
| TRIS/HCl buffer 500 mM pH 8 | Tris(hydroxymethyl)aminomethane and chloridric acid |
| TBS                         | TRIS buffer                                         |
| TTBS                        | 0.1%Tween20-TBS                                     |

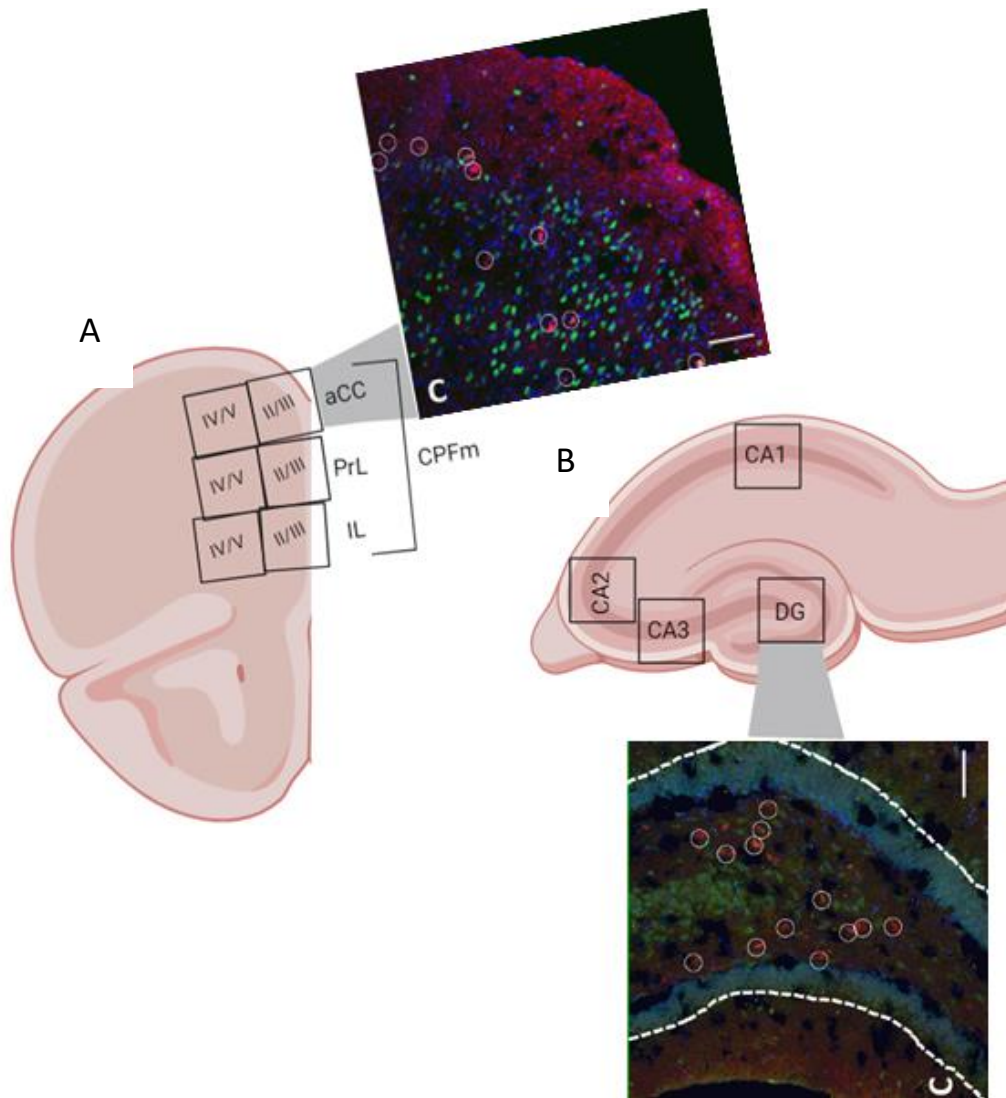

**Figure S1.** Illustrative scheme of the regions analyzed in this study. **A)** Representation of the mPFC and the three subregions evaluated (aCC, PrL, and IL), each one subdivided according to the cortical layers: upper layers (II/III) and deeper layers (IV/V). The total number of neurons, the number of each interneuron (PV+, CB+, and SOM+), and the ratio (interneuron/total neurons) were evaluated in both subdivisions of cortical layers in the three subregions. The amount observed in the deeper + the upper layers of a subregion was added to calculate the total for the whole subregion. Data for the whole mPFC was calculated as the sum of the amount observed in alle subregions. **B)** Representation of the hippocampus and the four evaluated subregions (DG, CA1, CA2, and CA3). In each of them, the total number of neurons, the number of each interneuron (PV+, CB+, and SOM+), and the ratio (interneuron/total neurons) were evaluated. **C)** Illustrative image. aCC, anterior cingulate cortex; CA, cornu ammonis; CB, calbindin-neurons; DG, dentate gyrus; IL, infralimbic cortex; mPFC, medial frontal cortex; PrL, prelimbic cortex; PV, parvalbumin-neurons; SOM, somatostatin-neurons.

| Structure/Time Point                  | Canales |       | Oskvig | Canales |      | Kalish |       |       |      |        |      |      |       |    |       | Kalish |       |         |        |       |      |      | Balmer |       | Cui |
|---------------------------------------|---------|-------|--------|---------|------|--------|-------|-------|------|--------|------|------|-------|----|-------|--------|-------|---------|--------|-------|------|------|--------|-------|-----|
|                                       | E12.5   | E14.5 | E15    | E17.5   | E14  |        |       |       |      |        |      |      |       |    | E18   |        |       |         |        |       |      | 6h   | 4d     | -     |     |
|                                       | Cort    | Cort  | Cort   | Cort    | EG   | CS     | IN    | S IN  | LI   | L V-VI | M    | SVZ  | P SVZ | RG | EG    | IN     | S IN  | L II-IV | L V-VI | OLIG  | RG   | SVZ  | Cells  | Cells | Org |
| GO Terms                              |         |       |        |         |      |        |       |       |      |        |      |      |       |    |       |        |       |         |        |       |      |      |        |       |     |
| Carbohydrate Metabolism               |         |       |        |         |      |        |       |       |      |        |      |      |       |    |       |        |       |         |        |       |      |      |        |       |     |
| Mitochondrial metabolism              |         |       |        |         |      |        |       |       |      |        |      |      |       |    |       |        |       |         |        |       |      |      |        |       |     |
| Response to ROS                       |         |       |        |         |      |        |       |       |      |        |      |      |       |    |       |        |       |         |        |       |      |      |        |       |     |
| Response To Hypoxia                   |         |       |        |         |      |        |       |       |      |        |      |      |       |    |       |        |       |         |        |       |      |      |        |       |     |
| Macromolecule Metabolism              |         |       |        |         |      |        |       |       |      |        |      |      |       |    |       |        |       |         |        |       |      |      |        |       |     |
| Lipid metabolism                      |         |       |        |         |      |        |       |       |      |        |      |      |       |    |       |        |       |         |        |       |      |      |        |       |     |
| Nucleic Acid Metabolism               |         |       |        |         |      |        |       |       |      |        |      |      |       |    |       |        |       |         |        |       |      |      |        |       |     |
| Purine Metabolism                     |         |       |        |         |      |        |       |       |      |        |      |      |       |    |       |        |       |         |        |       |      |      |        |       |     |
| Pyrimidine Metabolism                 |         |       |        |         |      |        |       |       |      |        |      |      |       |    |       |        |       |         |        |       |      |      |        |       |     |
| rRNA metabolism                       |         |       |        |         |      |        |       |       |      |        |      |      |       |    |       |        |       |         |        |       |      |      |        |       |     |
| ncRNA metabolism/process              |         |       |        |         |      |        |       |       |      |        |      |      |       |    |       |        |       |         |        |       |      |      |        |       |     |
| RNA processing                        |         |       |        |         |      |        |       |       |      |        |      |      |       |    |       |        |       |         |        |       |      |      |        |       |     |
| RNA splicing                          |         |       |        |         |      |        |       |       |      |        |      |      |       |    |       |        |       |         |        |       |      |      |        |       |     |
| Gene Expression                       |         |       |        |         |      |        |       |       |      |        |      |      |       |    |       |        |       |         |        |       |      |      |        |       |     |
| Aminoacid metabolism                  |         |       |        |         |      |        |       |       |      |        |      |      |       |    |       |        |       |         |        |       |      |      |        |       |     |
| Protein Metabolism                    |         |       |        |         |      |        |       |       |      |        |      |      |       |    |       |        |       |         |        |       |      |      |        |       |     |
| Translation                           |         |       |        |         |      |        |       |       |      |        |      |      |       |    |       |        |       |         |        |       |      |      |        |       |     |
| Protein Elongation                    |         |       |        |         |      |        |       |       |      |        |      |      |       |    |       |        |       |         |        |       |      |      |        |       |     |
| Post translational Modifications      |         |       |        |         |      |        |       |       |      |        |      |      |       |    |       |        |       |         |        |       |      |      |        |       |     |
| Ubiquitination Regulation             |         |       |        |         |      |        |       |       |      |        |      |      |       |    |       |        |       |         |        |       |      |      |        |       |     |
| Histone modification                  |         |       |        |         |      |        |       |       |      |        |      |      |       |    |       |        |       |         |        |       |      |      |        |       |     |
| Cell Cycle                            |         |       |        |         |      |        |       |       |      |        |      |      |       |    |       |        |       |         |        |       |      |      |        |       |     |
| Ion Transport                         |         |       |        |         |      |        |       |       |      |        |      |      |       |    |       |        |       |         |        |       |      |      |        |       |     |
| Eye Development                       |         |       |        |         |      |        |       |       |      |        |      |      |       |    |       |        |       |         |        |       |      |      |        |       |     |
| Cell Adhesion                         |         |       |        |         |      |        |       |       |      |        |      |      |       |    |       |        |       |         |        |       |      |      |        |       |     |
| Extracellular Matrix                  |         |       |        |         |      |        |       |       |      |        |      |      |       |    |       |        |       |         |        |       |      |      |        |       |     |
| Synapse                               |         |       |        |         |      |        |       |       |      |        |      |      |       |    |       |        |       |         |        |       |      |      |        |       |     |
| GABA metabolism / signaling           |         |       |        |         |      |        |       |       |      |        |      |      |       |    |       |        |       |         |        |       |      |      |        |       |     |
| GLU metabolism / signaling            |         |       |        |         |      |        |       |       |      |        |      |      |       |    |       |        |       |         |        |       |      |      |        |       |     |
| WNT pathway                           |         |       |        |         |      |        |       |       |      |        |      |      |       |    |       |        |       |         |        |       |      |      |        |       |     |
| Notch pathway                         |         |       |        |         |      |        |       |       |      |        |      |      |       |    |       |        |       |         |        |       |      |      |        |       |     |
| Hippo pathway                         |         |       |        |         |      |        |       |       |      |        |      |      |       |    |       |        |       |         |        |       |      |      |        |       |     |
| Adenylyl Cyclase/cAMP signaling       |         |       |        |         |      |        |       |       |      |        |      |      |       |    |       |        |       |         |        |       |      |      |        |       |     |
| MAPK/ERK                              |         |       |        |         |      |        |       |       |      |        |      |      |       |    |       |        |       |         |        |       |      |      |        |       |     |
| Nervous System Development            |         |       |        |         |      |        |       |       |      |        |      |      |       |    |       |        |       |         |        |       |      |      |        |       |     |
| GABAergic interneuron differentiation |         |       |        |         |      |        |       |       |      |        |      |      |       |    |       |        |       |         |        |       |      |      |        |       |     |
| Neuron development/migration          |         |       |        |         |      |        |       |       |      |        |      |      |       |    |       |        |       |         |        |       |      |      |        |       |     |
|                                       | 1.83    | 5.52  | 5.15   | 7.60    | 5.06 | 6.20   | 4.65* | 4.67* | 9.93 | 5.41   | 4.45 | 5.32 | 4.52* | 0  | 5.03* | 4.88*  | 5.22* | 6.71*   | 0      | 2.91* | 7.47 | 5.84 | 7.42   | 6.36  |     |

**Figure S2.** Compilation of the databases from ASD or associated models analyzed in this study. The five databases (described in Table 1) are organized according to the time-point of embryo development (where applicable) with the most relevant pathways listed in the left column. Gray squares represent pathways associated with the DGEs in general; Orange squares represent pathways specifically associated with upregulated DGEs; and blue squares represent pathways specifically associated with downregulated DGEs. The numbers in the bottom line represent the percentage of orthologs identified in the SFARI database, \*indicate that a mean was obtained from all of the cells associated with the specific region. Cort.: cortex; CS: cortical subplate; DGE: differentially expressed genes; GE: ganglionic eminence; IN: interneuron; L: layer; OLIG: oligodendrocyte; Org: organoid; RG: radial glia; S IN: striatal interneuron; SVZ: subventricular zone.

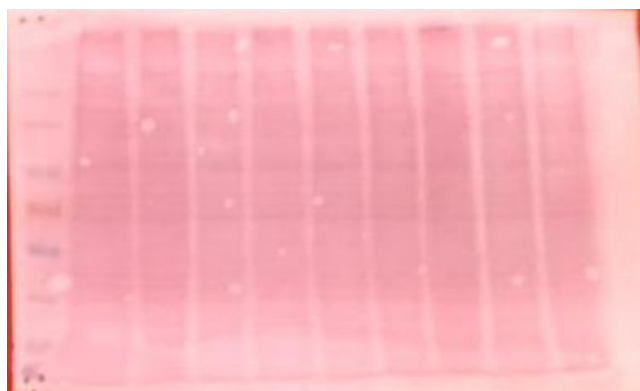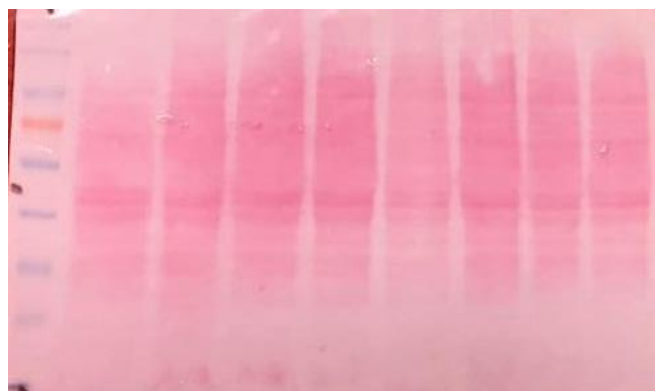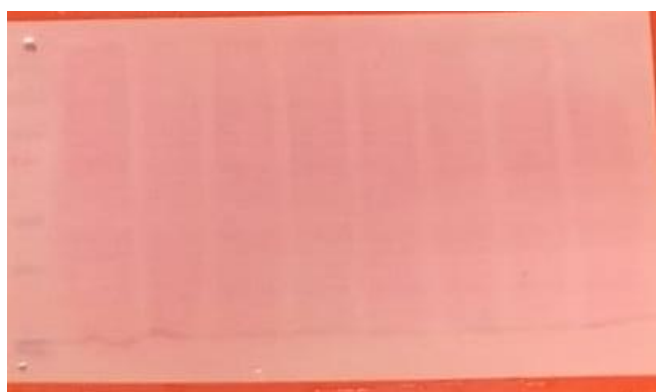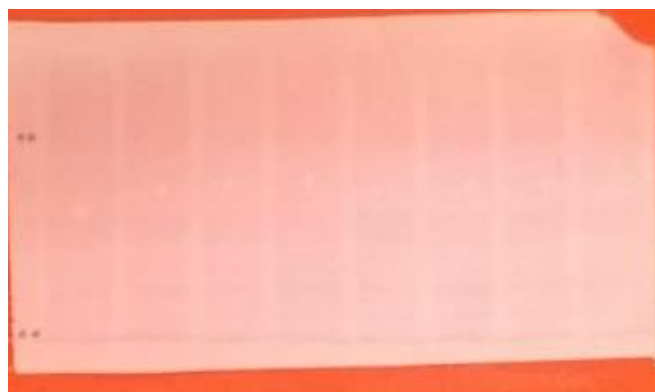

**Supplementary Figure S3. Ponceau staining of the nitrocellulose membranes – mPFC**

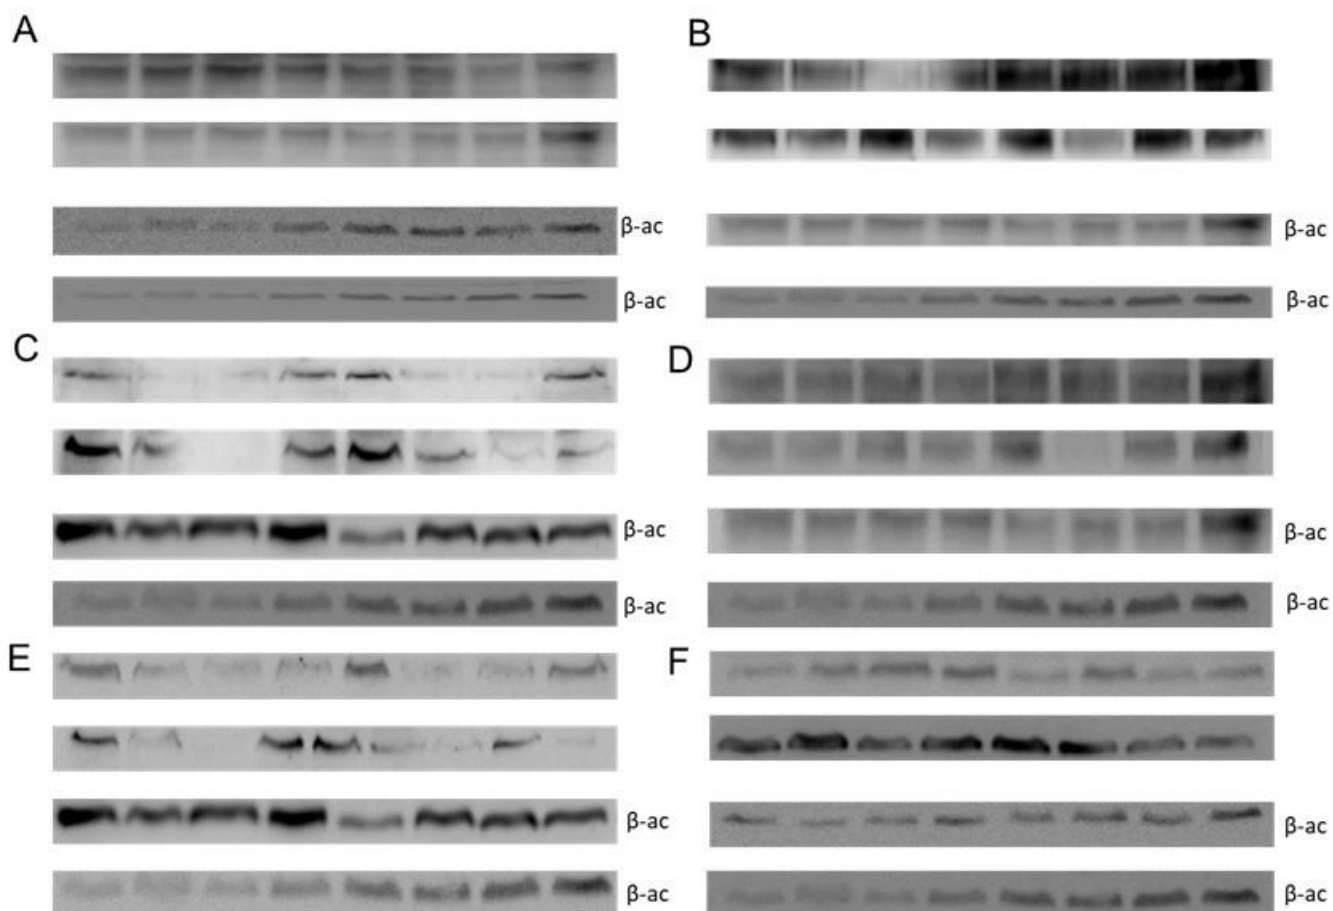

**Supplementary Figure S4. Nitrocellulose membranes mPFC.** A) GABA<sub>A</sub>; B) GABA<sub>B</sub>; C) Gephyrin; D) PSD-95; E) Neurolygin-2; F) Synaptophysin. In the image,  $\beta$ -ac stands for  $\beta$ -actin.

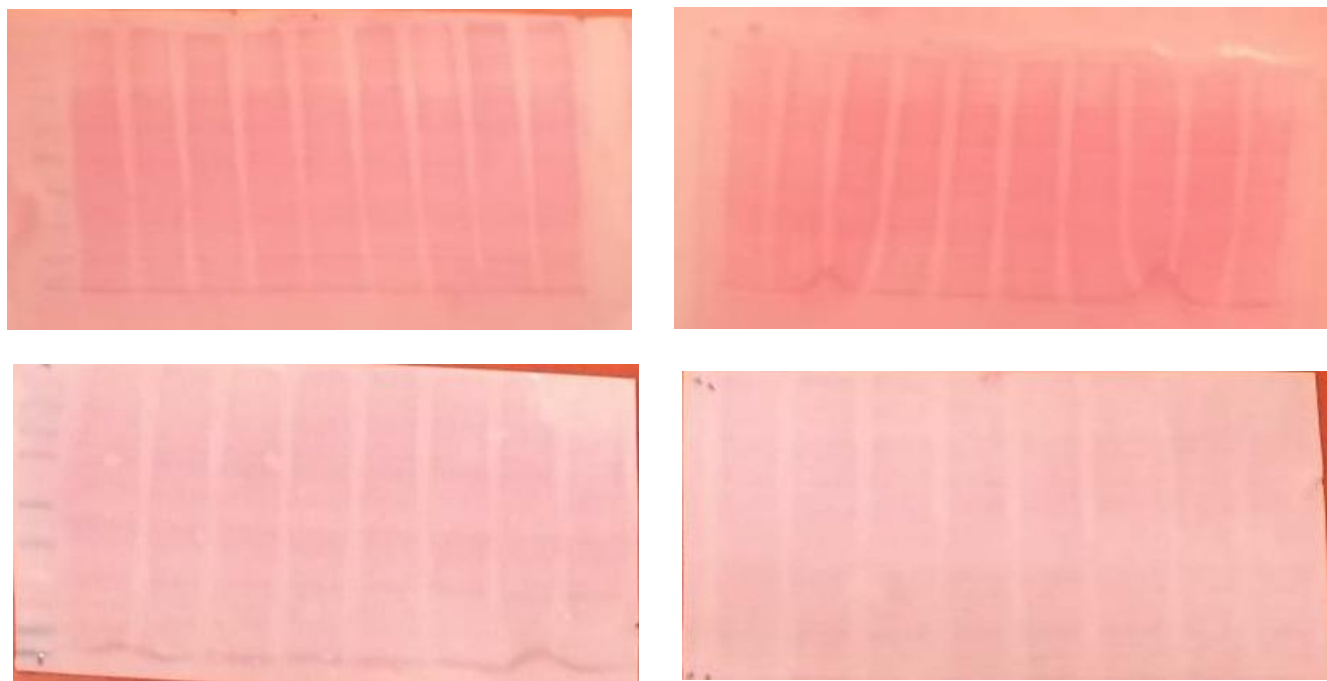

**Supplementary Figure S5. Ponceau staining of the nitrocellulose membranes – HC**

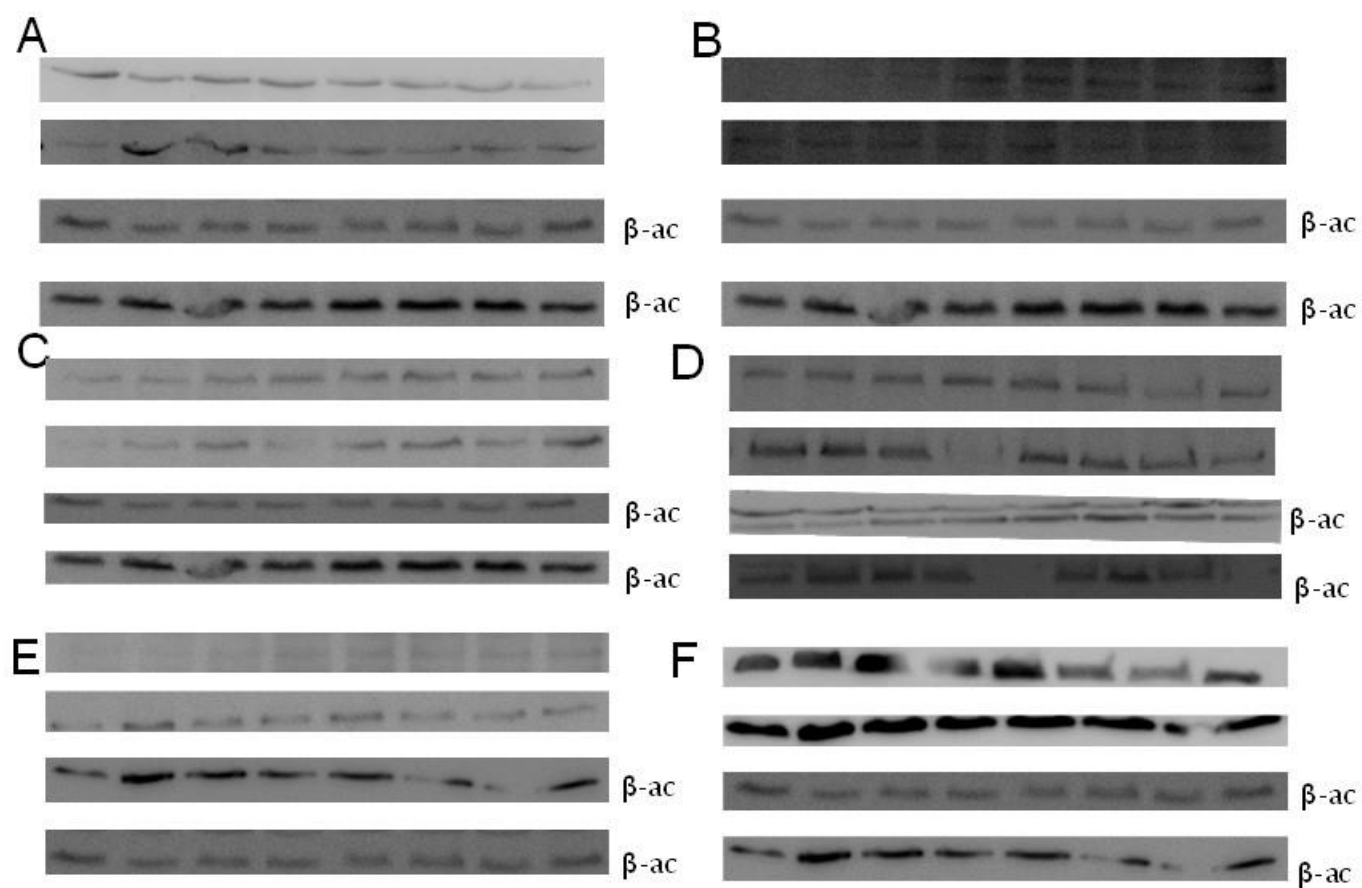

**Supplementary Figure S6. Nitrocellulose membranes HC.** A) GABA<sub>A</sub>; B) GABA<sub>B</sub>; C) Gephyrin; D) PSD-95; E) Neurolygin-2; F) Synaptophysin. In the image,  $\beta$ -ac stands for  $\beta$ -actin.
